# Supplementary material
Source: HighWire-hosted journal article supplement (https://bmjopen.bmj.com/content/6/5/e011585)
Supplement: inline-supplementary-material-1 [file inline-supplementary-material-1.pdf]

| CRF                           | Variable                             | Scale   | Source           | time of measurement           | range or use                                  | factor*                              |
|-------------------------------|--------------------------------------|---------|------------------|-------------------------------|-----------------------------------------------|--------------------------------------|
| patient_admission             | PatientID                            | nominal | e-care           | presentation to ER            | for linking CRFs only                         | administration purposes              |
| patient_admission             | date and time of admittance          | metric  | e-care           | presentation to ER            | 00:00 – 23:59                                 | overcrowding                         |
| patient_admission             | age                                  | metric  | e-care           | presentation to ER            | 18-120                                        | ?                                    |
| patient_admission             | gender                               | nominal | e-care           | presentation to ER            | male/female                                   | ?                                    |
| patient_admission             | triage-category                      | nominal | e-care           | presentation to ER            | 1 – 5                                         | overcrowding                         |
| patient_admission             | admitting entity                     | nominal | e-care           | presentation to ER            | self, physician, ambulance, external hospital | ?                                    |
| patient_discharge             | patient ID                           | nominal | e-care           | presentation to ER            | for linking CRFs only                         | administration purposes              |
| patient_discharge             | IM-lead-diagnosis                    | nominal | i-pDOS           | hospitalization + 28 days     | text                                          | used to calculate dependent variable |
| patient_discharge             | duration of hospitalization          | metric  | i-pDOS           | hospitalization + 28 days     | 1-28                                          | ?                                    |
| patient_hospitalization_ecare | patient ID                           | nominal | e-care           | presentation to ER            | for linking CRFs only                         | administration purposes              |
| patient_hospitalization_ecare | date and time of hospitalization     | metric  | e-care           | hospitalization               | 00:00 – 23:59                                 | overcrowding                         |
| patient_hospitalization_ecare | admittance diagnosis                 | nominal | i-pDOS           | hospitalization               | text                                          | used to calculate dependent variable |
| physician_per_patient_quest   | patient ID                           | nominal | e-care           | presentation to ER            | for linking CRFs only                         | administration purposes              |
| physician_per_patient_quest   | physician ID                         | nominal | self chosen code | hospitalization               | for linking CRFs only                         | administration purposes              |
| physician_per_patient_quest   | subjective workload                  | ordinal | questionnaire    | hospitalization               | 0-10                                          | working condition                    |
| physician_per_patient_quest   | confidence in diagnosis              | ordinal | questionnaire    | hospitalization               | 0-10                                          | dependent variable                   |
| physician_per_patient_quest   | language barrier                     | nominal | questionnaire    | hospitalization               | yes/no                                        | ?                                    |
| physician_per_patient_quest   | difficulty of diagnosis              | ordinal | questionnaire    | hospitalization               | 0-10                                          | experience                           |
| physician_per_patient_quest   | symptoms typical for diagnosis       | nominal | questionnaire    | hospitalization               | typical/non-typical                           | ?                                    |
| physician_per_patient_quest   | experience with similar diagnosis    | ordinal | questionnaire    | hospitalization               | 0-10                                          | experience                           |
| physician_per_patient_quest   | fatigue                              | ordinal | questionnaire    | hospitalization               | 0-10                                          | working condition                    |
| physician_per_patient_quest   | quality of teamwork                  | metric  | questionnaire    | hospitalization               | 0-10                                          | ?                                    |
| physician_inclusion_quest     | physician ID                         | nominal | self chosen code | inclusion                     | for linking CRFs only                         | administration purposes              |
| physician_inclusion_quest     | cognitive reflection test            | metric  | questionnaire    | inclusion                     | 0-3                                           | ?                                    |
| physician_inclusion_quest     | age                                  | metric  | questionnaire    | inclusion                     | 20-68                                         | experience                           |
| physician_inclusion_quest     | gender                               | nominal | questionnaire    | inclusion                     | male/female                                   | ?                                    |
| physician_inclusion_quest     | year of medical degree               | metric  | questionnaire    | inclusion                     | 1950 – 2015                                   | experience                           |
| physician_inclusion_quest     | years of experience in emergency med | metric  | questionnaire    | inclusion                     | 0-45                                          | experience                           |
| physician_inclusion_quest     | board certification                  | nominal | questionnaire    | inclusion                     | yes/no                                        | ?                                    |
| physician_inclusion_quest     | discipline of board certification    | nominal | questionnaire    | inclusion                     | Internal medicine, surgery, GP, other         | ?                                    |
| physician_inclusion_quest     | position                             | nominal | questionnaire    | inclusion                     | resident, consultant, student                 | ?                                    |
| continuously                  | noise level                          | metric  | sound logger     | continuously throughout study | 0 – 130 db(A)                                 | noise                                |

CRF=case report form

e-care=electronic patient documentation system at the ER

i-pDOS=electronic patient documentation system at IM

\*=we assume several variables to be highly correlated and group those into factors for later analysis (see main text)
